# Supplementary material
Source: HighWire-hosted journal article supplement (https://www.annfammed.org/content/suppl/2019/07/05/17.4.373)
Supplement: Day_Supp_App.pdf [file Day_Supp_App.pdf]

**Supplemental materials for:**

Day MA, Belden JL. EMR Happy hour: new approach to electronic medical record continuous learning.  
*Ann Fam Med.* 2019;17(4):373.

## **SUPPLEMENTAL DATA**

### **Topics for EMR Happy Hour at MU Health Care**

#### **Overall efficiency**

- Use of EMR iOS applications with voice recognition
- Creating “favorites” for time-intensive or difficult to remember DME or medication orders
- Access other providers’ orders favorites
- Adjusting default display settings (i.e. date range) for lab results

#### **Documentation/data entry**

- Use of the EMR iOS app with voice recognition
- Initiate and complete your entire note on a mobile device
- Making transition to new physician documentation platform
- Identifying visit types best suited for use of pre-completed notes
- Efficient documentation of procedures with shared general templates
- Efficient entry/modification of Family, Social, and Surgical histories
- Efficient modification of the Problem List
- Incorporate nursing data entry for lead screening, depression, anxiety, ADHD, or bipolar disorder into clinical note

#### **Result follow up**

- Generating letters to communicate patient results
- Register patients for the online patient portal

#### **Messaging efficiency**

- Adjust settings to allow deletion of messages automatically after sending response
- Use of a summary view to see patient information as needed to appropriately answer a patient message (medications, lab results, etc)

#### **Quality metrics**

- Documentation of diabetic foot and eye examinations appropriately, to enable quality measure capture
- Documentation of health maintenance measures
